# Supplementary material
Source: publisher site journal article supplement (https://www.dovepress.com/article/349335)
Supplement: Supplementary file 1 [file get_supplementary_file.php]

**Supplemental Material**

**Table S1** Surgical procedures

| **Variable** | **CCL group (n = 11)** | **ICL group (n = 17)** |
| --- | --- | --- |
| **Extent of resection** |  |  |
| Complete CL | 5 (45.5) | 3 (17.6) |
| Partial CL | 6 (54.5) | 14 (82.4) |
| Complete CL + right hemi-hepatectomy | 3 (27.2) | - |
| Complete CL + right posterior segmentectomy | 2 (18.2) | - |
| Partial CL + left hemi-hepatectomy | 4 (36.4) | - |
| Partial CL + right hemi-hepatectomy | 2 (18.2) | - |
| **Surgical approach** |  |  |
| Left-side | 4 (36.4) | 9 (52.9) |
| Right-side | 2 (18.1) | 5 (29.4) |
| Bilateral | 5 (45.5) | 1 (5.9) |
| Anterior | 0 (0.0) | 2 (11.8) |

Notes: Variables reported as number (percentage).

Abbreviations: CCL, combined caudate lobectomy; ICL, isolated caudate lobectomy; CL, caudate lobectomy.

**Table S2** NOS scores of the studies

| **Total** | **Shimada, M.**  **(1994)** | **Yang**  **(1996)** | **Yamamoto**  **(2004)** | **Tanaka**  **(2005)** | **Peng**  **(2006)** | **Sakoda**  **(2009)** | **Liu**  **(2012)** | **Zhou**  **(2013)** | **Shimada, S.**  **(2019)** |
| --- | --- | --- | --- | --- | --- | --- | --- | --- | --- |
| Selection | 3 | 3 | 4 | 4 | 4 | 4 | 4 | 4 | 4 |
| Comparability | 0 | 0 | 1 | 1 | 1 | 1 | 1 | 1 | 1 |
| Outcome | 2 | 2 | 2 | 3 | 2 | 3 | 3 | 2 | 2 |
| Total NOS Score | 5 | 5 | 7 | 8 | 7 | 8 | 8 | 7 | 7 |

Abbreviations: NOS, Newcastle-Ottawa scale.

**Table S3** Summary of reports on surgical parameters of caudate HCC

| **Authors** | **Published year** | **Country** | | **CCL** | **ICL** | **Operation time (min)*** | | **Blood loss (ml)*** | | **Morbidity** | | **Mortality** | |
| --- | --- | --- | --- | --- | --- | --- | --- | --- | --- | --- | --- | --- | --- |
| **CCL** | **ICL** | **CCL** | **ICL** | **CCL** | **ICL** | **CCL** | **ICL** |
| Shimada M. | 1994 | Japan | 2 | | 7 | 472.50±24.75 | 352.14±135.92 | 4800.00±424.26 | 2478.57±2376.60 | 2 | 5 | 0 | 1 |
| Yang | 1996 | China | 4 | | 2 | 348.75±90.40 | 245.00±148.49 | 1350.00±1078.58 | 1200.00±1131.37 | 0 | 0 | 0 | 0 |
| Yamamoto | 2004 | Japan | 8 | | 7 | NA | NA | NA | NA | NA | NA | NA | NA |
| Tanaka | 2005 | Japan | 14 | | 6 | NA | NA | NA | NA | NA | NA | NA | NA |
| Peng | 2006 | China | 20 | | 19 | 248.00±96.00 | 296.00±99.00 | 1108.00±970.00 | 1237.00±893.00 | NA | NA | NA | NA |
| Sakoda | 2009 | Japan | 6 | | 6 | 378.33±138.15 | 294.17±63.75 | 1683.33±983.76 | 815.83±480.92 | 1 | 2 | 1 | 0 |
| Liu | 2012 | China | 20 | | 16 | 175.20±20.07 | 240.00±39.57 | 491.21±222.13 | 806.67±344.86 | 2 | 7 | 0 | 0 |
| Zhou | 2013 | China | 10 | | 13 | 202.00±32.90 | 316.50±59.60 | 615.00±290.60 | 1011.50±447.30 | 3 | 5 | 0 | 0 |
| Shimada S. | 2019 | Japan | 12 | | 27 | 385.61±89.60 | 309.50±111.61 | 1204.45±1371.53 | 1092.58±1443.79 | 2 | 6 | 0 | 0 |
| This study | ~~-~~ | China | 11 | | 17 | 299.18±116.76 | 144.29±78.76 | 814.55±746.74 | 368.24±577.74 | 5 | 5 | 0 | 0 |

Notes: *****Variables reported as mean ± standard deviation

Abbreviations: CCL, combined caudate lobectomy; ICL, isolated caudate lobectomy; NA, not available.


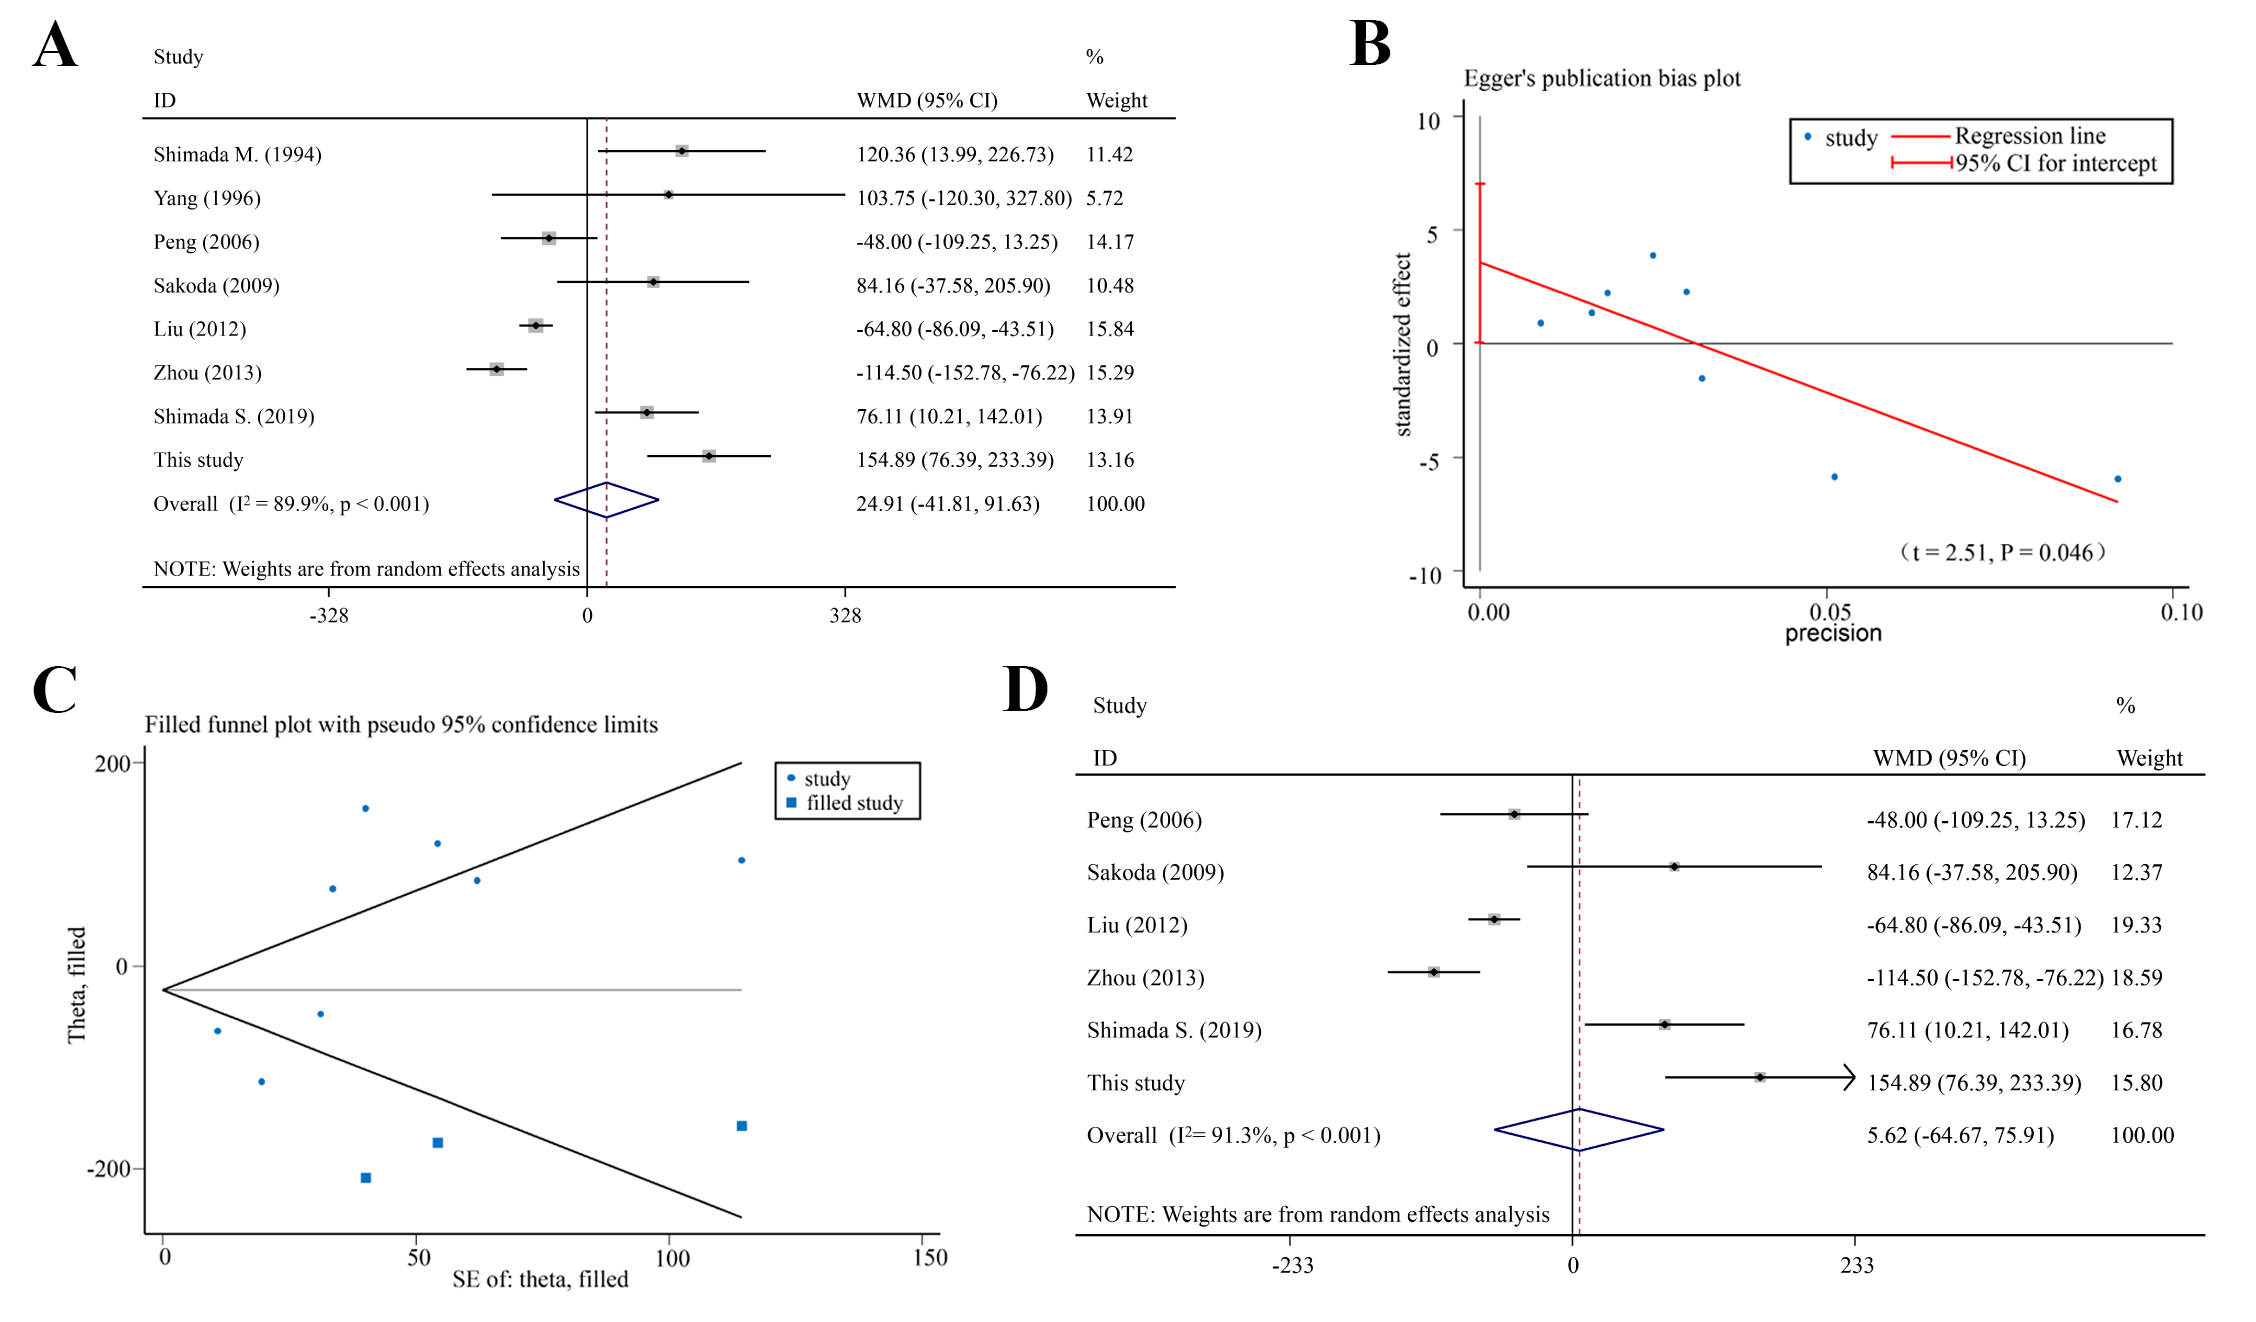


**Fig. S1 Meta-analysis of operation time between CCL and ICL groups for the treatment of caudate HCC.** (A)Forest plot generated from meta-analysis of operation time between CCL and ICL groups; (B) Egger’s test for the publication bias in the meta-analysis of operation time between CCL and ICL groups; (C) Trim-and-fill method in the meta-analysis of operation time between CCL and ICL groups; (D) Forest plot generated from meta-analysis of operation time after excluding two low-quality studies.


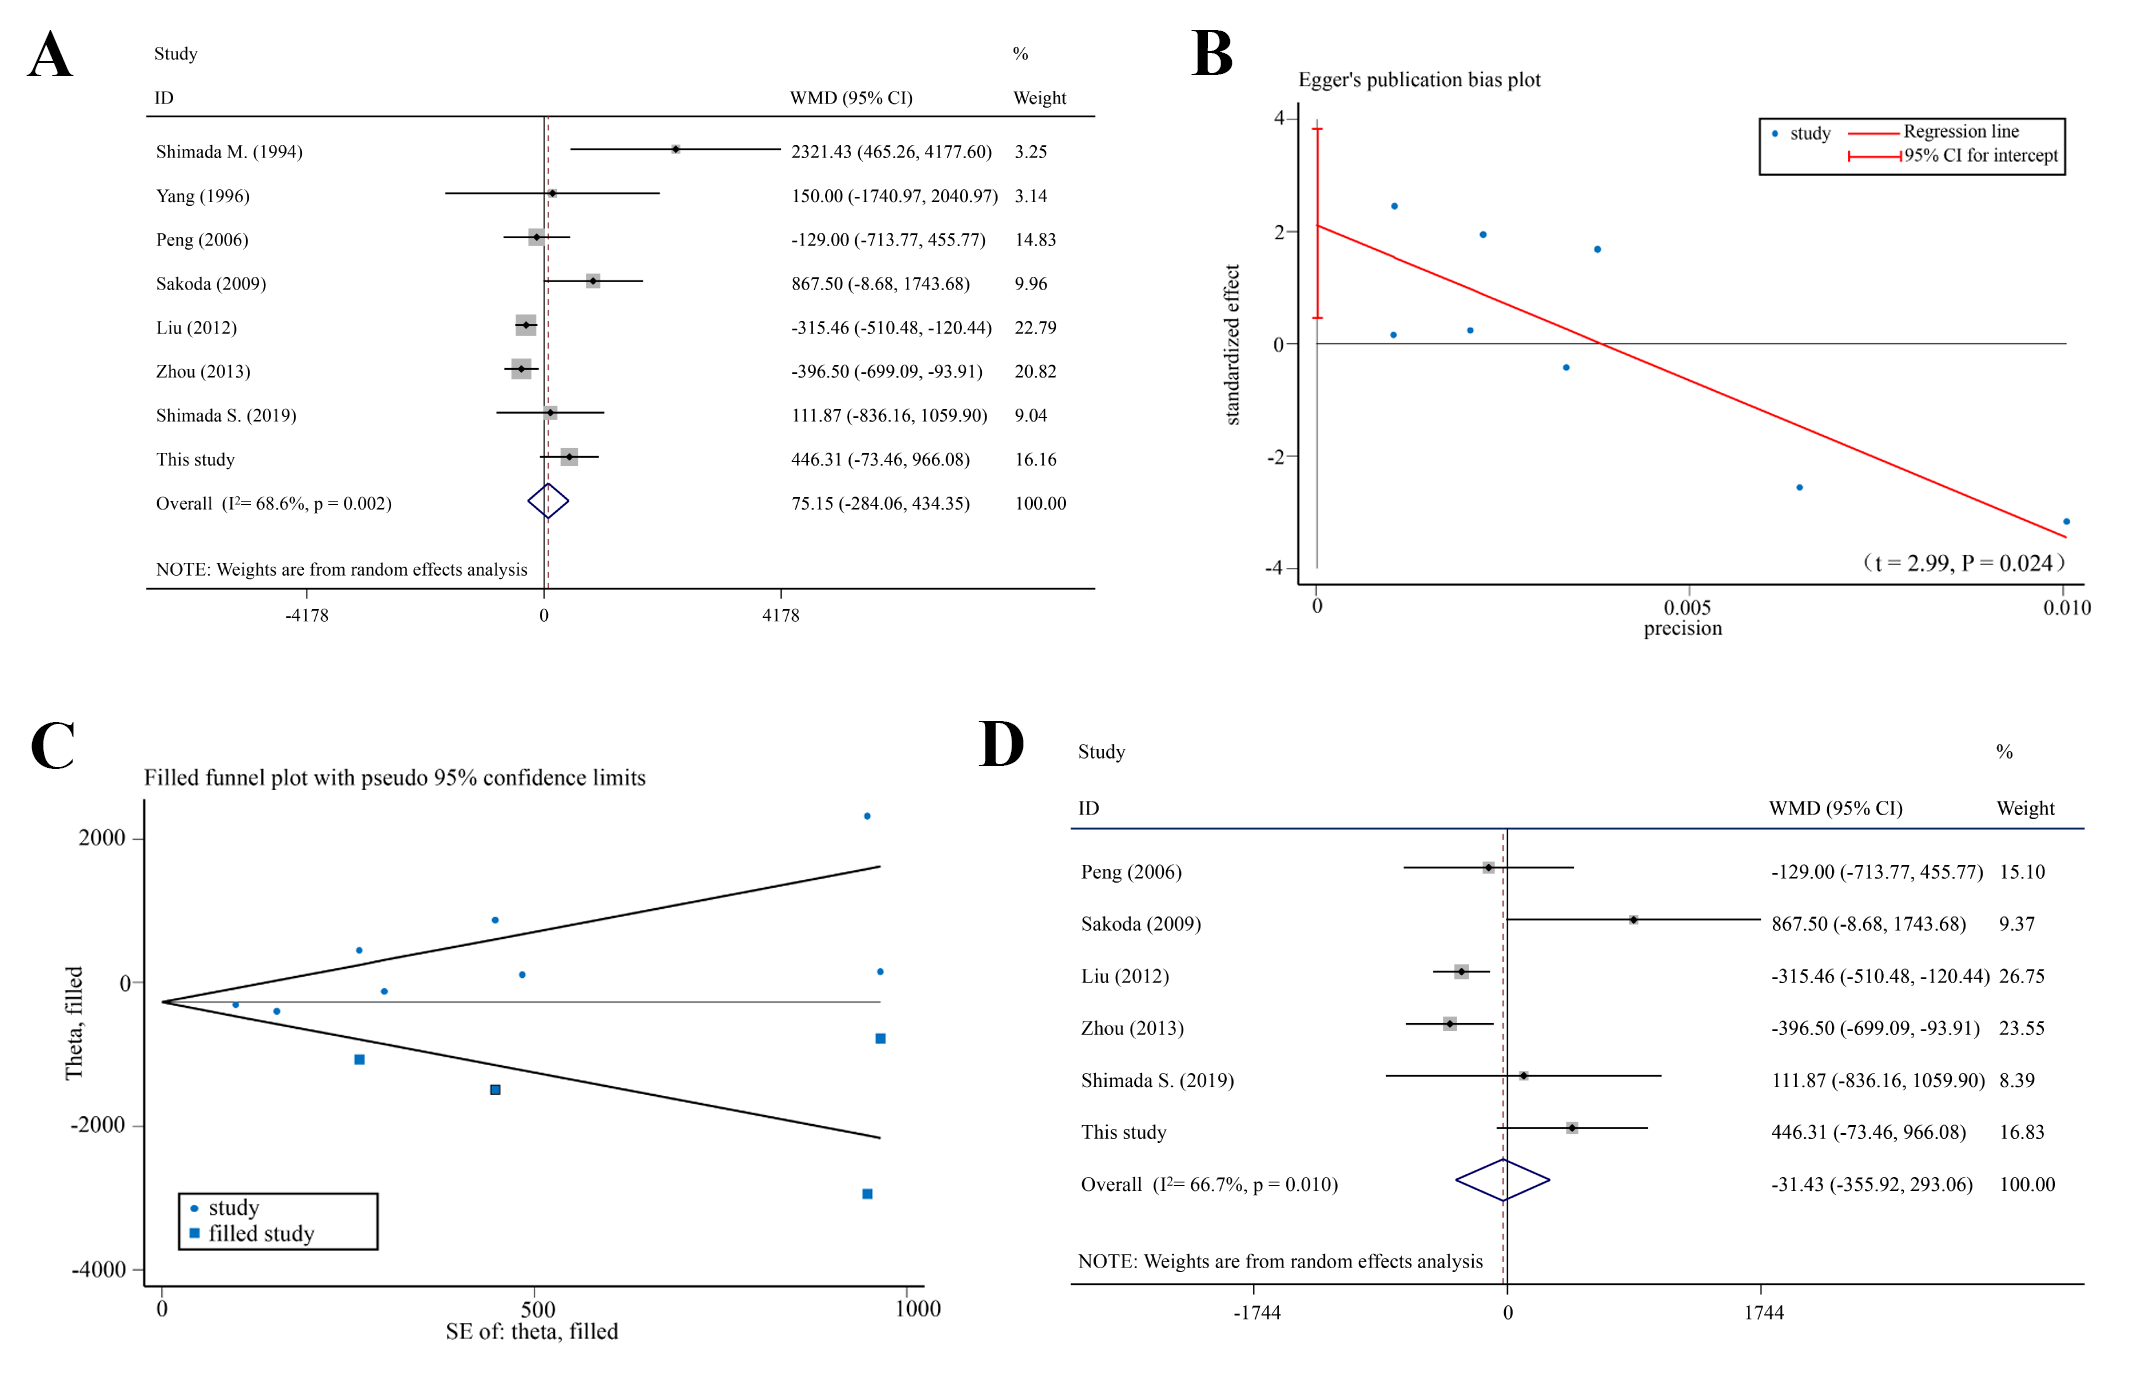


**Fig. S2 Meta-analysis of intraoperative blood loss between CCL and ICL groups for the treatment of caudate HCC.** (A) Forest plot generated from meta-analysis of intraoperative blood loss between CCL and ICL groups; (B) Egger’s test for the publication bias in the meta-analysis of intraoperative blood loss between CCL and ICL groups; (C) Trim-and-fill method in the meta-analysis of intraoperative blood loss between CCL and ICL groups; (D) Forest plot generated from meta-analysis of intraoperative blood loss after excluding two low-quality studies.


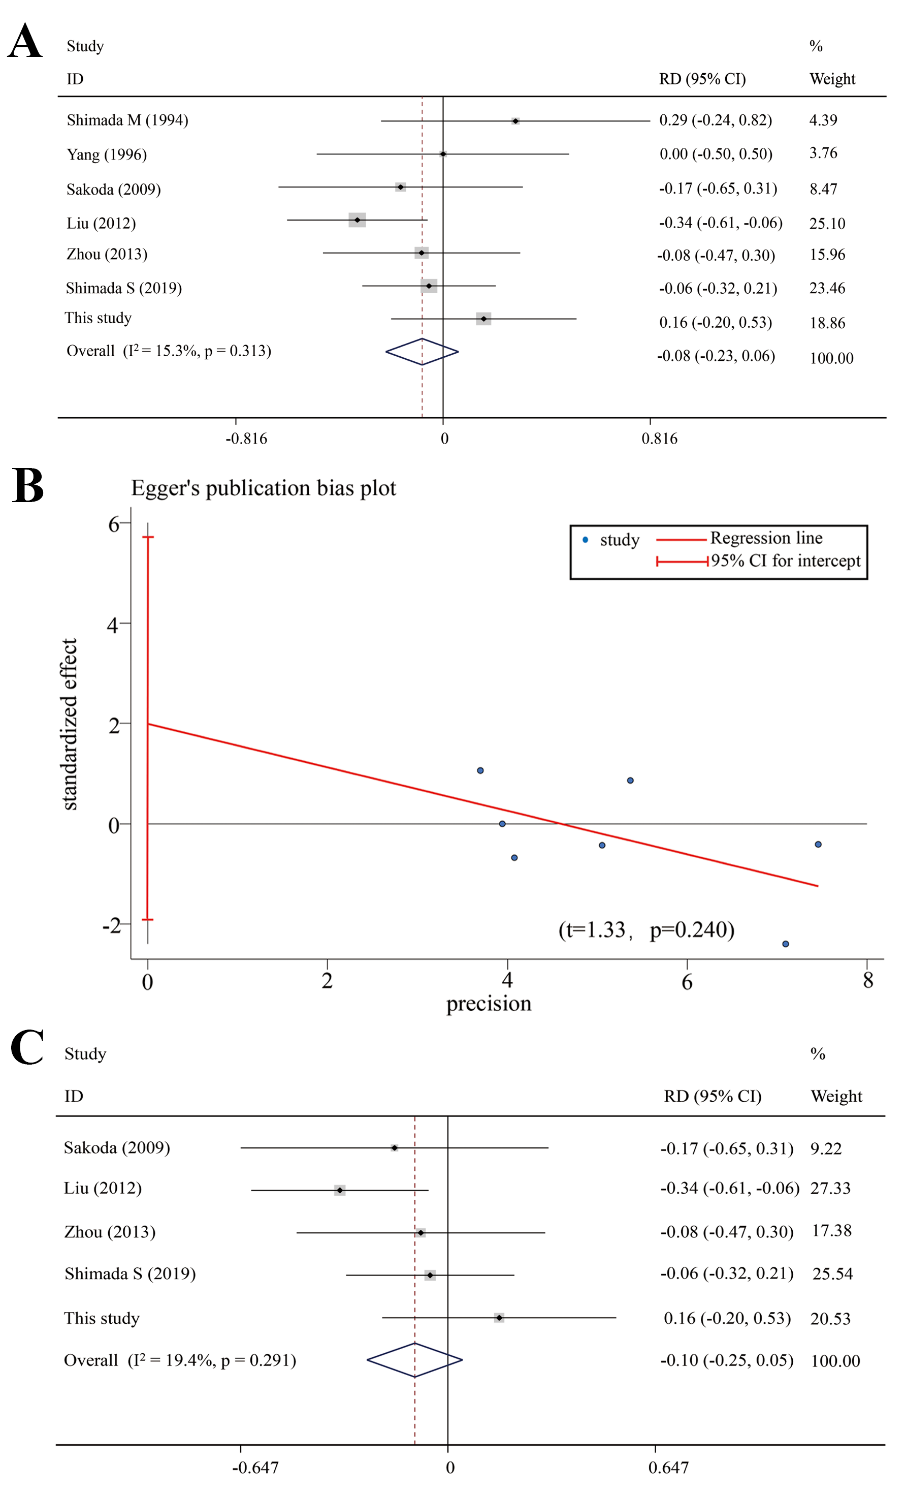


**Fig. S3 Meta-analysis of postoperative morbidity between CCL and ICL groups for the treatment of caudate HCC.** (A) Forest plot generated from meta-analysis of postoperative morbidity between CCL and ICL groups; (B) Egger’s test for the publication bias in the meta-analysis of postoperative morbidity between CCL and ICL groups; (C) Forest plot generated from meta-analysis of postoperative morbidity after excluding two low-quality studies.


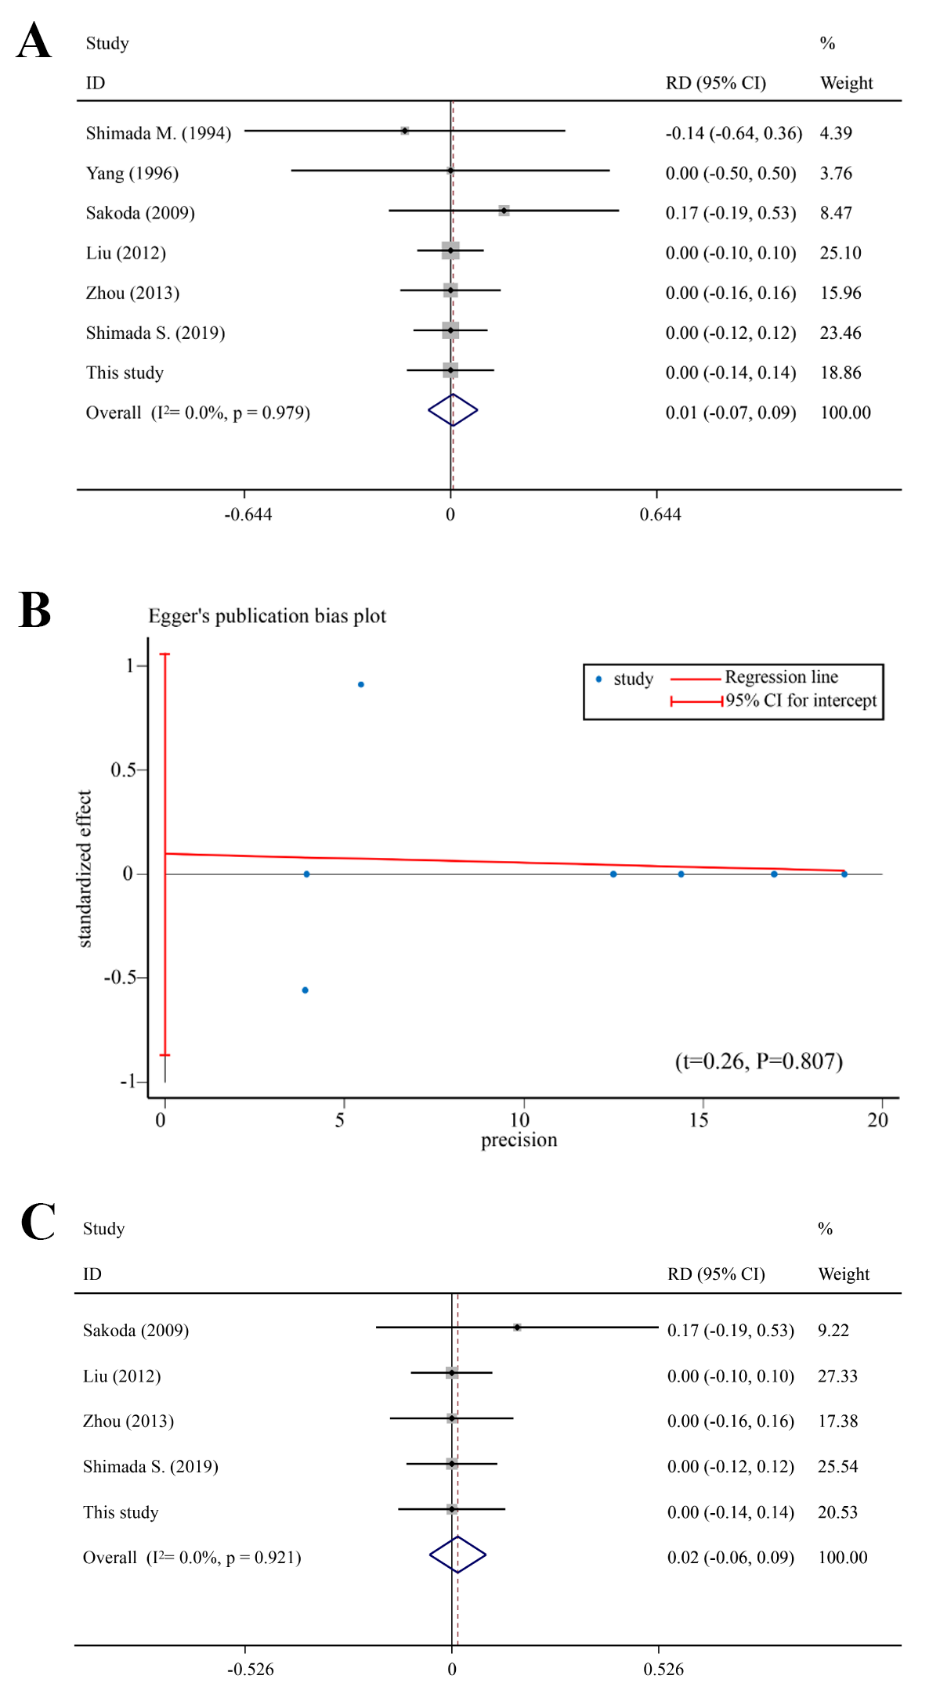


**Fig. S4 Meta-analysis of postoperative mortality between CCL and ICL groups for the treatment of caudate HCC.** (A) Forest plot generated from meta-analysis of postoperative mortality between CCL and ICL groups; (B) Egger’s test for the publication bias in the meta-analysis of postoperative mortality between CCL and ICL groups; (C) Forest plot generated from meta-analysis of postoperative mortality after excluding two low-quality studies.
